# Supplementary material
Source: publisher figshare collection journal article supplement (https://acs.figshare.com/ndownloader/files/3770503)
Supplement: Supplementary file 1 [file 3770503]

Movie Captions

**Generation of Motion of Drops with Interfacial Contact**

Manoj K. Chaudhury1*, Aditi Chakrabarti1 and Susan Daniel2

*1Department of Chemical and Biomolecular Engineering, Lehigh University, Bethlehem, PA 18015*

*2School of Chemical and Biomolecular Engineering, Cornell University, Ithaca, NY 14850*

**MOVIES:**

Movie 1: Dynamic de-pinning of the receding contact line of a 10L water drop on an inclined fibrillated PDMS surface (Figure 3c, text).

<http://static-content.springer.com/esm/art%3A10.1140%2Fepje%2Fi2013-13015-2/MediaObjects/10189_2013_9829_MOESM1_ESM.mpg>

Movie 2: Barrier crossing of a small (10L) water drop on an undulated (fibrillated) PDMS substrate when subjected to random noise.

<http://static-content.springer.com/esm/art%3A10.1140%2Fepje%2Fi2013-13015-2/MediaObjects/10189_2013_9829_MOESM4_ESM.mpg>

Movie 3: Hysteresis induced rectified motion of a water drop (10 L) when it is periodically stretched and squeezed between two gradient surfaces (Figure 6a, text).

Movie 4: A fluidic device operates by combining two principles: hysteresis induced rectification (movie 3) and surface patterning (Figure 6d, text).

Movie 5: A small (4L) drop of water does not exhibit any directed motion on a low hysteresis surface even when it is subjected to an asymmetric vibration (Figure 7a, text).

Movie 6: Flow reversal: two water drops of dissimilar sizes moving in opposite directions. A smaller drop (1 L) moves downward on an inclined plane whereas a larger (4 L) drop moves upward. (Figure 7c, text).

Movie 7: Measurement of cloud point transition by inducing motion of a drop using asymmetric vibration on a surface having a thermal gradient. Here the drop is a surfactant solution (1% Triton-X 100 in water) (Figure 8a, text).

[http://pubs.acs.org/doi/suppl/10.1021/la046886s/suppl_file/la046886ssi20050207_060734.mpg](http://pubs.acs.org/doi/suppl/10.1021/la046886s/suppl_file/la046886ssi20050207_060734.mpg%20)

Movie 8: Random noise induced motion of water drops on a surface. The drops accelerate when they coalesce (Figure 13b-c, text).

Movie 9: Coalescence of drops on a gradient surface designed on a heat exchanger leads to rapid motion. The speed of the motion decreases with the decrease of the rate of condensation (Figure 14c, text).

Movie 10: Diffusive motion of condensed water drops on a surface with absorbing boundaries in the absence of a continuous gradient (Figure 15d, text).

[Movie 1 from [http://www.sciencedirect.com/science/article/pii/S2352431614000108#ec000005](http://www.sciencedirect.com/science/article/pii/S2352431614000108%23ec000005) ]

Movie 11: Motion of drops induced by a periodic wettability gradient (Figure 15e, text).

Movie 12: Diffusive motion of drops formed by spraying of mist on a surface in the presence of absorbing boundaries (Figure 15g, text).

[Movie 2 from

[http://www.sciencedirect.com/science/article/pii/S2352431614000108#ec000010](http://www.sciencedirect.com/science/article/pii/S2352431614000108%23ec000010)]
